1 **Title:**

2 **Different states of priority recruit different neural codes in visual working memory**

3 **Authors:**

4 Qing Yu<sup>1,\*</sup> and Bradley R. Postle<sup>1,2,\*</sup>

5 **Affiliations:**

6 <sup>1</sup>Department of Psychiatry, University of Wisconsin-Madison, Madison, WI 53719, USA

7 <sup>2</sup>Department of Psychology, University of Wisconsin-Madison, Madison, WI 53706,

8 USA

9 **\*Correspondence should be addressed to:**

10 Qing Yu

11 Department of Psychiatry

12 University of Wisconsin-Madison

13 Madison, WI 53719, USA

14 Email: [qyu55@wisc.edu](mailto:qyu55@wisc.edu)

15 Or:

16 Bradley R. Postle

17 Department of Psychology

18 University of Wisconsin-Madison

19 Madison, WI 53706, USA

20 Email: [postle@wisc.edu](mailto:postle@wisc.edu)

21

22

## 23 **Abstract**

24 We tracked the neural representation of information with different priority  
25 (“attended memory items, AMI” and “unattended memory items, UMI”), using  
26 multivariate inverted encoding models with fMRI data from different stages of multiple  
27 tasks. Although representation of the identity of AMI and of the UMI was found in a  
28 broad brain network, including early visual, parietal and frontal cortex, the identity of the  
29 UMI was actively represented in early visual cortex in a distinct “reversed” code,  
30 suggesting early visual cortex as a site of the focus of attention. The location context of  
31 the AMI and of the UMI was also broadly represented, although only frontoparietal  
32 regions supported the simultaneous, priority-tagged representation of the location of all  
33 items in working memory. Our results suggest that a dynamic interplay between  
34 multiplexed stimulus representations and a frontoparietal salience map may underlie the  
35 flexible control of behavior.

36

## 37 **Introduction**

38 Important for understanding the flexible control of behavior<sup>1,2</sup> is understanding  
39 working memory, the mental retention of task-relevant information and the ability to  
40 manipulate it and use this information to guide contextually appropriate actions<sup>3,4</sup>. State-  
41 based theoretical models of working memory posit that information can be held at  
42 different levels of priority in working memory, with information at the highest level of  
43 priority in the focus of attention (FoA), and the remaining information in a variously  
44 named state of “activated long-term memory”<sup>5</sup> or “region of direct access”<sup>6</sup>. Much of the  
45 empirical support for these models comes from tasks using a “retrocing” procedure in

46 which, after a trial's to-be-remembered information has been removed from view, a  
47 subset of that information is cued to indicate that it will be tested. Retrocuing can both  
48 improve memory performance behaviorally<sup>7</sup> and increase the strength of retrocued  
49 information neutrally<sup>8</sup>.

50 The retrocuing procedure allows for the controlled study of the back-and-forth  
51 switching of priority between memory items that is required for many complicated  
52 working memory tasks, such as the n-back<sup>9</sup> and working memory span<sup>10</sup> tasks. In the dual  
53 serial retrocuing (DSR) task, two items are initially presented as memoranda, followed by  
54 a retrocue that designates one the "attended memory item" (AMI) that will be  
55 interrogated by the impending probe. The uncued item cannot be dropped from working  
56 memory, however, because following the initial memory probe, a second retrocue may  
57 indicate (with  $p = 0.5$ ) that this initially uncued item will be tested by the second memory  
58 probe. Thus, following the initial retrocue, the uncued item becomes an "unattended  
59 memory item" (UMI)<sup>11</sup>. fMRI and EEG studies of the DSR task have demonstrated that  
60 an active representation was only observed for the AMI, but not for the UMI, using  
61 multivariate pattern classification (MVPA)<sup>12-14</sup>. Thus, an elevated level of activation,  
62 particularly in temporo-occipital networks associated with visual perception, may be a  
63 neural correlate of the FoA. The neural bases of the UMI, however, are less clear.

64 Most DSR studies to date have failed to find MVPA evidence for an active  
65 representation of the UMI<sup>12-14</sup>, although such a trace can be transiently reactivated with a  
66 pulse of transcranial magnetic stimulation (TMS)<sup>15</sup>. The one study that has found  
67 evidence for active representations of the UMI localized them to parietal and frontal  
68 cortex, in an analysis of fMRI data from 87 subjects<sup>16</sup>. Thus, the current preponderance

69 of extant data suggests that the neural representation of the UMI may be at a level of  
70 sustained activity that is so low as to be at or below the boundary of what can be detected  
71 with current methods and conventional set sizes. Although there are mechanisms other  
72 than elevated activity that could represent information in working memory<sup>17,18</sup>, the work  
73 presented here was designed to assess two alternative hypotheses about the neural  
74 representation of the UMI that have received less attention to date. One is that the  
75 representation of the UMI may be active, but in a representational format fundamentally  
76 different from those of AMI, and therefore difficult to detect with MVPA methods. The  
77 second is that what may be most prominently maintained in working memory is a  
78 representation of the trial-unique context in which the UMI was presented, rather than a  
79 representation of stimulus identity per se.

80 Although MVPA is a powerful analytic technique that can provide evidence of  
81 whether two kinds of information are different, it is inherently limited in that it doesn't  
82 directly provide information about how they differ. Therefore, in the current study we  
83 used multivariate inverted encoding modeling (IEM)<sup>19-22</sup> to evaluate item-level  
84 mnemonic representations of AMIs and UMIs. By specifying an explicit model of how  
85 stimulus properties are represented in large populations of voxels, we could assess  
86 quantitative and qualitative changes in stimulus representation as a function of changes in  
87 priority status. IEM may also be a more sensitive method for tracking working memory  
88 representations<sup>22</sup>.

89 Our results revealed two important properties of UMI representations: first, rather  
90 than being just a “weak AMI”, the UMI is actively represented in early visual cortex, in a  
91 format that is different from the AMI; second, contextual information about the UMI is

92 represented differently than information inherent to the stimulus. That is, frontoparietal  
93 circuits maintain a representation of the location of both memory items that also encodes  
94 their priority status, a property absent from spatial representations in early visual cortex.

95

## 96 **Results**

### 97 *Experiment 1*

#### 98 *Behavioral results*

99 Participants performed two DSR tasks (*Retain1* and *Retain2*) in the scanner. In  
100 the *Retain1* task, although two orientation patches were initially presented as targets, the  
101 same one was always cued twice, meaning that the initially cued orientation remained in  
102 the focus of attention (i.e., the AMI) for the remainder of the trial, and the uncued item  
103 could be dropped from memory (“dropped memory item,” DMI). In the *Retain2* task, the  
104 initially uncued item became a UMI, because it was possible that it would be cued by the  
105 second retrocue (Figure 1a). Accuracy in the *Retain1* ( $63.9\% \pm 1.7\%$ ) and *Retain2*  
106 ( $67.0\% \pm 2.0\%$ ) tasks did not differ ( $t(7) = 1.402, p = 0.204$ ), nor did accuracies for the  
107 Stay ( $67.3\% \pm 2.0\%$ ) and Switch ( $62.6\% \pm 2.8\%$ ) conditions of the *Retain2* task ( $t(7) =$   
108  $1.856, p = 0.106$ ).

109

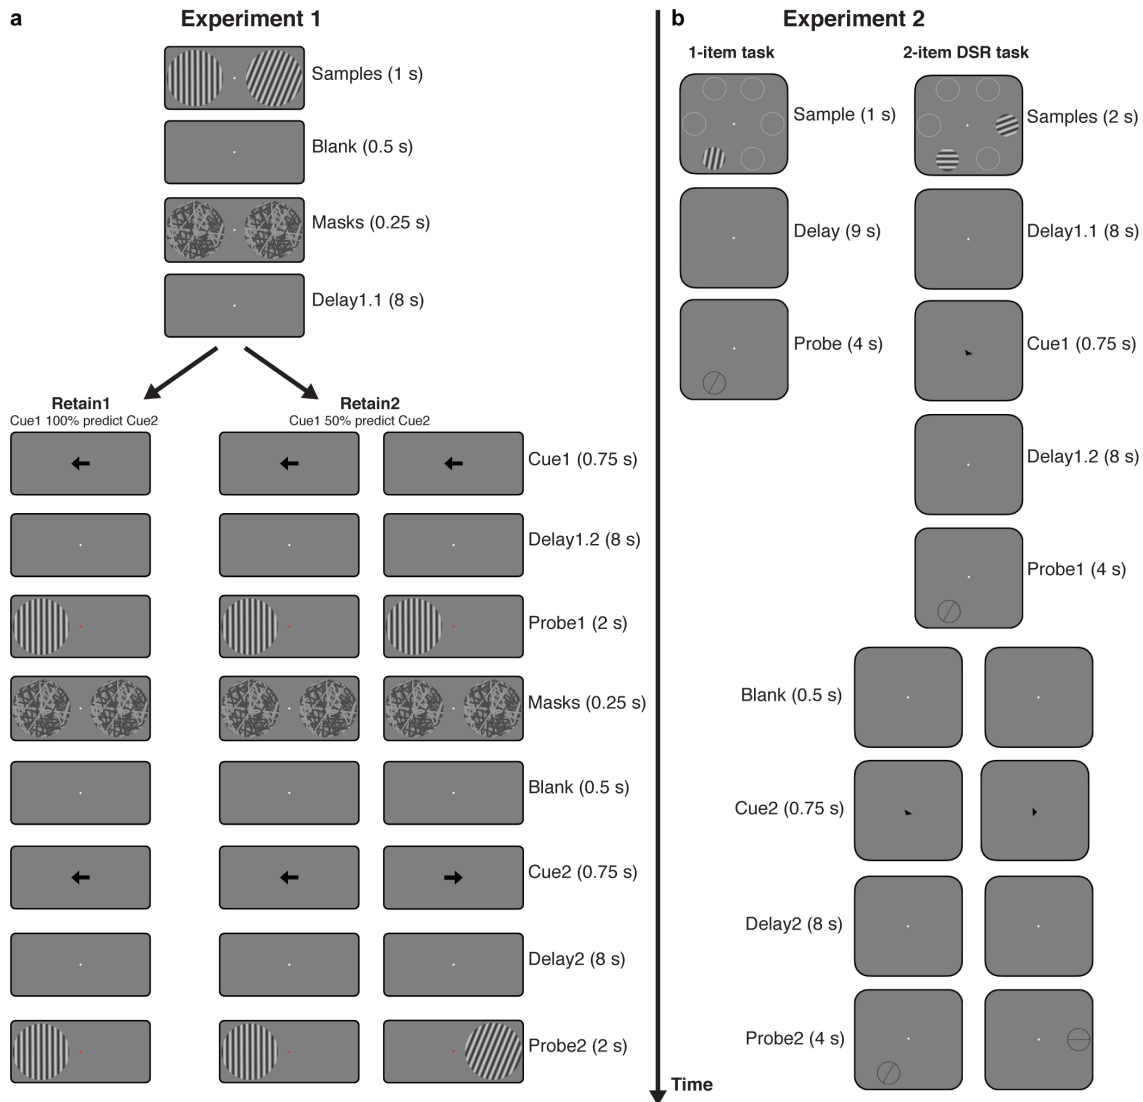

110

111 **Figure 1.** Experimental procedure.

112 **a.** In Experiment 1, participants performed two tasks in the scanner in separate blocks. In

113 *Retain1* task, participants remembered two orientations for Delay1.1, one in each

114 hemifield, and were cued on one of them for Delay1.2. After a first probe, the same cue

115 appeared and participants needed to recall the same orientation once again after Delay2.

116 The probe task was a change detection task. In *Retain2* task, participants underwent the

117 same procedure, except that the second cue may switch to the other orientation on 50% of

118 the trials. **b.** In Experiment 2, participants performed the *Retain2* task only, and the two

119 orientations could appear in two of six different locations (white circles are for  
120 demonstration purposes and were not present during the actual experiment). Participants  
121 performed a delay-estimation task of orientations. Besides the main experiment task,  
122 participants also performed a one-item working memory task for training independent  
123 IEMs.

124

125 *Reconstructing the neural representation of orientation of the AMI, the DMI, and the*  
126 *UMI*

127 Our analytic strategy was to compare IEM reconstructions from models trained on  
128 different trial conditions to assess the similarity of representational format between the  
129 trained and tested conditions. For Delay1.1, all trials were used to train the IEM, because  
130 both items had equal priority status. For Delay1.2, different IEMs were trained using  
131 either the AMI or UMI/DMI labels. For AMI-trained IEMs, only the cued stimuli were  
132 used to train the IEM, and the IEM was tested on data from both AMI-labeled and  
133 UMI/DMI-labeled data. When tested with UMI/DMI-labeled data, reconstructions from  
134 this AMI-trained IEM would index the extent to which the representational format of the  
135 UMI/DMI was similar to that of the AMI. For UMI/DMI-trained IEMs, the IEM was  
136 trained and tested on the uncued stimulus. This IEM allowed us to examine the  
137 UMI/DMI representation without being biased by attended information.

138 For Experiment 1 we focused on a Sample-evoked ROI constrained to early visual  
139 cortex, because most studies have found robust evidence for an active representation of  
140 the AMI in this brain region. Furthermore, no studies, including the Christophel et al.  
141 study<sup>16</sup>, have found evidence for an active representation of the UMI in this region.

142 During Delay1.1 (6-8 s after trial onset), when participants had no knowledge of which  
143 item in the memory set would be cued, the IEM reconstruction of both was robust, in  
144 both the *Retain1* ( $p = 0.010$  and  $p < 0.00001$ ) and *Retain2* ( $p = 0.031$  and  $p < 0.00001$ )  
145 conditions (Figure 2; two participants were excluded from further analyses due to lack of  
146 robust orientation reconstructions in this delay period). Moreover, no significant  
147 difference was observed between the two orientation representations in either condition  
148 ( $ps = 0.431$  and  $0.271$ ). All the  $p$ -values were corrected across conditions using False  
149 Discovery Rate (FDR) method in this and subsequent analyses.

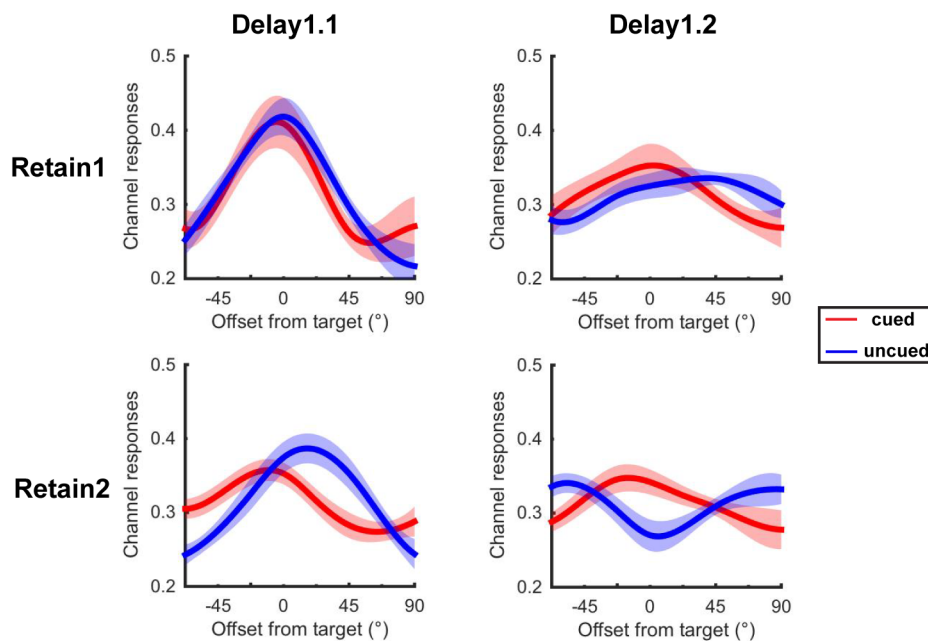

150

151 **Figure 2.** Experiment 1: Orientation reconstruction during different epochs of Delay1 in  
152 the Sample-defined visual ROI.

153 Orientation reconstructions in the *Retain1* and *Retain2* conditions in Delay1.1 (6-8 s) and  
154 Delay1.2 (16-18 s). Red line represents the cued orientation (AMI during Delay1.2), and  
155 blue line represents the uncued orientation (UMI during Delay1.2). Reconstructions were  
156 averaged across all participants. Continuous curves were created with spline interpolation



157 method for demonstration purposes. Channel responses are estimated BOLD responses in  
158 relative amplitude. Shaded areas indicate  $\pm 1$  SEM.

159

160 For Delay1.2 (the portion of Delay1 that followed the retrocue) we focused on 16-  
161 18 s after trial onset (i.e., 6-8 s after retrocue) for maximization of the retrocuing effect.

162 In the *Retain1* condition, robust representation of stimulus orientation was observed for

163 the AMI ( $p = 0.037$ ). In contrast, reconstruction of the DMI was unsuccessful, whether

164 tested with the AMI-trained or the UMI/DMI-trained IEM ( $ps = 0.424$  and  $0.915$ ). In the

165 *Retain2* condition, with the AMI-trained IEM, reconstructions of the orientation of the

166 AMI and of the UMI went in opposite directions: a marginally significant positive

167 reconstruction for the AMI ( $p = 0.061$ ) and a significantly negative reconstruction for the

168 UMI ( $p = 0.037$ ). The negative reconstruction of the UMI had the lowest response in the

169 target channel, and progressively higher responses in non-target channels that grew with

170 the distance of the non-target channel increased (Figure 2). The UMI could not be

171 reconstructed with a UMI/DMI-trained IEM ( $p = 0.587$ ; Supplementary Figure 1).

172 The finding of a reliable negative reconstruction for the UMI during late Delay1.2

173 was noteworthy because it deviated from the expectation that we would replicate

174 previous failures to find evidence for an active representation of the UMI during

175 Delay1.2<sup>12-15</sup>, It was also inconsistent with the most intuitive alternative account for these

176 previous null findings, which has been that the post-cue representation of the UMI may

177 be qualitatively the same as it was prior to the cue, but the magnitude of its activation has

178 decreased to a level that is no longer detectable. This is because a significant negative

179 reconstruction would require a distributed pattern of activity that differs both from the

180 trained pattern and from baseline, implying an active representation with a code that is  
181 different from, in this case, the code with which the AMI was represented during  
182 Delay1.2. Furthermore, this finding would implicate early visual cortex in the active  
183 representation of the UMI, which is at variance with accounts positing a privileged role  
184 for higher-level regions in visual working memory storage during conditions involving  
185 shifting attention<sup>16</sup> or distraction<sup>23,24</sup>. Finally, this finding would represent, to our  
186 knowledge, the first report of a negative IEM reconstruction as an interpretable index of  
187 the state of an *active* neural representation of stimulus information.

188         For the reasons listed above, we took several steps to explore possible artifactual  
189 explanations for this result. Primarily, we considered the possibility that the negative  
190 reconstruction of the orientation of the UMI may have reflected influences from the AMI,  
191 because the two could never take the same value on the same trial, but instead always had  
192 a distance of at least 22.5°. The reasoning behind this alternative account is that  
193 recentering all UMI reconstructions on a common target channel would necessarily  
194 produce a situation in which every AMI fell on a non-target channel, and this could result  
195 in a negative-going reconstruction after averaging across trials. One reason to doubt this  
196 alternative account a priori is because a negative reconstruction was not observed for the  
197 DMI in the *Retain1* condition, despite the fact that its procedural conditions were  
198 identical. Nonetheless, to assess this possibility analytically, we sorted trials by the  
199 distance between the UMI and AMI into four bins (22.5°, 45°, 67.5°, 90°), and obtained  
200 reconstructions for these four bins separately. We found that a negative reconstruction of  
201 the UMI was obtained for each bin, demonstrating the robustness of a negative UMI  
202 reconstruction regardless of the angular distance to the AMI (Supplementary Figure 2).

203 Furthermore, if the AMI had an influence on UMI reconstruction due to the minimum  
204 distance between the two, one would also expect negative reconstruction when testing  
205 data from Delay1.1 using labels of the item that would become the UMI in Delay1.2.  
206 With this analysis, however, IEM reconstruction failed (i.e., it was not negative;  $p =$   
207 0.816; Supplementary Figure 3).

208 As an additional step to assess the robustness of the negative reconstruction of the  
209 UMI in late Delay1.2, we repeated the analysis using trials from the *Retain2* condition  
210 only, to exclude any potential influence from the *Retain1* trials. This analysis, although  
211 carried out with only part of the data of the original analysis (50%-67%, depending on the  
212 participant), produced a similar negative reconstruction of the UMI ( $p = 0.049$ ) with an  
213 AMI-trained model, and no significant reconstruction of the UMI ( $p = 0.577$ ) with a  
214 UMI-trained model (Supplementary Figure 4).

## 215 *Experiment 2*

216 Due to its novel and unexpected nature, it was important that we replicate  
217 evidence from Experiment 1 for an *active* but *negative* representation of the UMI in early  
218 visual cortex. With Experiment 2, we also sought to extend this finding in important  
219 ways. First, we would extend our analyses into parietal and frontal regions that have also  
220 been implicated in the working memory representation of information. Second, we would  
221 investigate in greater detail the representational bases of the UMI by training IEMs with  
222 data from a variety of cognitive conditions. Finally, we would investigate whether the  
223 representation of an item's trial-specific context might be differently sensitive to  
224 changing priority. To elaborate, in Experiment 1 any given orientation patch was  
225 presented on one of two locations over the course of an experimental session. This means

226 that success on any individual trial required not just a memory that a particular item (say,  
227 a patch with an orientation of  $30^\circ$ ) had been presented at the beginning of the trial, but  
228 also a memory of *where* that item had been presented. We have hypothesized that,  
229 because maintaining the binding between an item's identity and its context is necessary to  
230 keep it in working memory<sup>25,26</sup>, this contextual information may be represented in a  
231 parietal salience map<sup>27</sup>. Therefore, we designed Experiment 2 to also assess the  
232 mnemonic representation of location context by modifying the DSR to feature 6 possible  
233 locations at which the two orientation patches could be presented on any trial.

#### 234 *Behavioral results*

235 Experiment 2 required recall responses, which were fit with a 3-factor mixture  
236 model (see Methods). The concentration parameter, which estimates the precision of  
237 responses, was marginally higher in the Stay condition ( $16.93 \pm 2.74$ ) compared to the  
238 Switch condition ( $11.35 \pm 1.67$ ),  $t(9) = 2.211$ ,  $p = 0.054$ . No such differences were found  
239 for any other parameters (probabilities of responses to target:  $79.9\% \pm 1.9\%$  vs.  $76.3\% \pm$   
240  $3.1\%$ ; probabilities of responses to non-target:  $3.7\% \pm 1.7\%$  vs.  $4.9\% \pm 2.4\%$ ;  
241 probabilities of guessing:  $16.4\% \pm 1.9\%$  vs.  $18.8\% \pm 2.9\%$ ),  $t_s < 1.199$ ,  $p_s > 0.261$ .

242

#### 243 *Reconstructing representations of the orientation of the AMI and UMI*

244 Besides the AMI- and UMI-trained IEMs as used in Experiment 1, we also trained  
245 IEMs on an independent 1-item delayed recall task in Experiment 2, for two reasons:  
246 First, these IEMs provided “idealized” estimates of how the brain represents these  
247 stimulus properties when only a single stimulus is being processed, thereby excluding  
248 any factors that may be associated with processing two stimuli simultaneously; second,

249 independent models were needed to directly compare IEM reconstructions between  
250 conditions. *P*-values reported in this section were corrected across conditions and time  
251 points within each ROI.

### 252 *AMI- and UMI-trained IEMs*

253 We first repeated the analyses from Experiment 1, with the difference that the  
254 analyses were performed regardless of the retinotopic locations of the stimuli, in order to  
255 maximize the number of trials available for each condition. We also applied the IEM  
256 analysis to each time point in Delay1.2 to examine how the neural codes changed  
257 dynamically with time. In early visual cortex (V1 and V2), patterns of reconstructions of  
258 orientation were broadly similar to the findings from Experiment 1 (Figure 3a): AMI-  
259 trained IEMs produced significantly positive reconstruction of the AMI in late Delay1.2  
260 ( $ps = 0.002$  and  $0.036$ ), and significantly negative reconstruction of the UMI ( $ps = 0.003$   
261 and  $0.036$ ); and UMI-trained IEMs failed to reconstruct the UMIs ( $ps = 0.654$  and  $0.475$ ).  
262 In IPS, however, we observed a qualitatively different pattern (Figure 3a): robust positive  
263 reconstructions of the AMI in all subregions (all  $ps < 0.049$  except in IPS1:  $p = 0.062$ )  
264 were accompanied by a positive reconstruction of the UMI in IPS5 ( $ps = 0.019$ ) towards  
265 the end of delay; and by positive-trending reconstructions of the UMI in IPS0-2 and IPS4  
266 (all  $ps < 0.098$ ). Also at variance with early visual ROIs, with UMI-trained IEMs the  
267 UMI could be successfully reconstructed in IPS5 ( $p = 0.024$ ), and with positive trends in  
268 IPS1 and IPS2 ( $ps = 0.076$  and  $0.086$ ). In FEF, the reconstruction of orientation was only  
269 successful for the UMI with the AMI-trained IEM, from 14 to 16 s ( $ps = 0.057$  and  $0.011$ ;  
270 Figure 4a-b). Together, these results indicate that although the UMI could be  
271 reconstructed in both early visual cortex (replicating Experiment 1) and in IPS and FEF,

272 it is represented in a different format in these two regions – different from the AMI in  
273 early visual cortex, similar to the AMI in IPS.

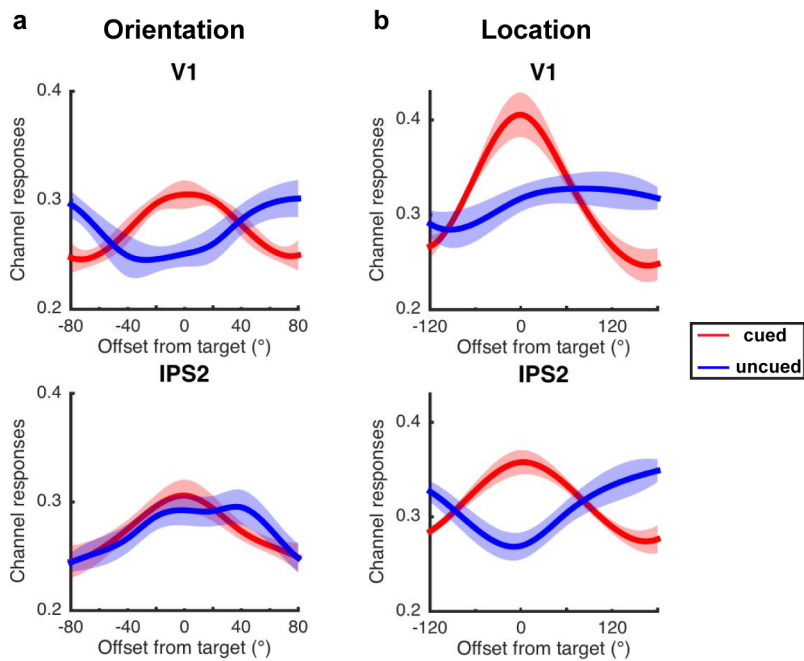

274

275 **Figure 3.** Experiment 2: Orientation and location reconstructions in V1 and IPS2.

276 Demonstration of orientation (a) and location (b) reconstructions at 18 s in two  
277 representative ROIs: V1 (early visual cortex) and IPS2 (parietal cortex), using an AMI-  
278 trained model. Red line represents the cued orientation (AMI during Delay1.2), and blue  
279 line represents the uncued orientation (UMI during Delay1.2). Reconstructions were  
280 averaged across all participants. Continuous curves were created with spline interpolation  
281 method for demonstration purposes. Channel responses are estimated BOLD responses in  
282 relative amplitude. Shaded areas indicate  $\pm 1$  SEM.

283

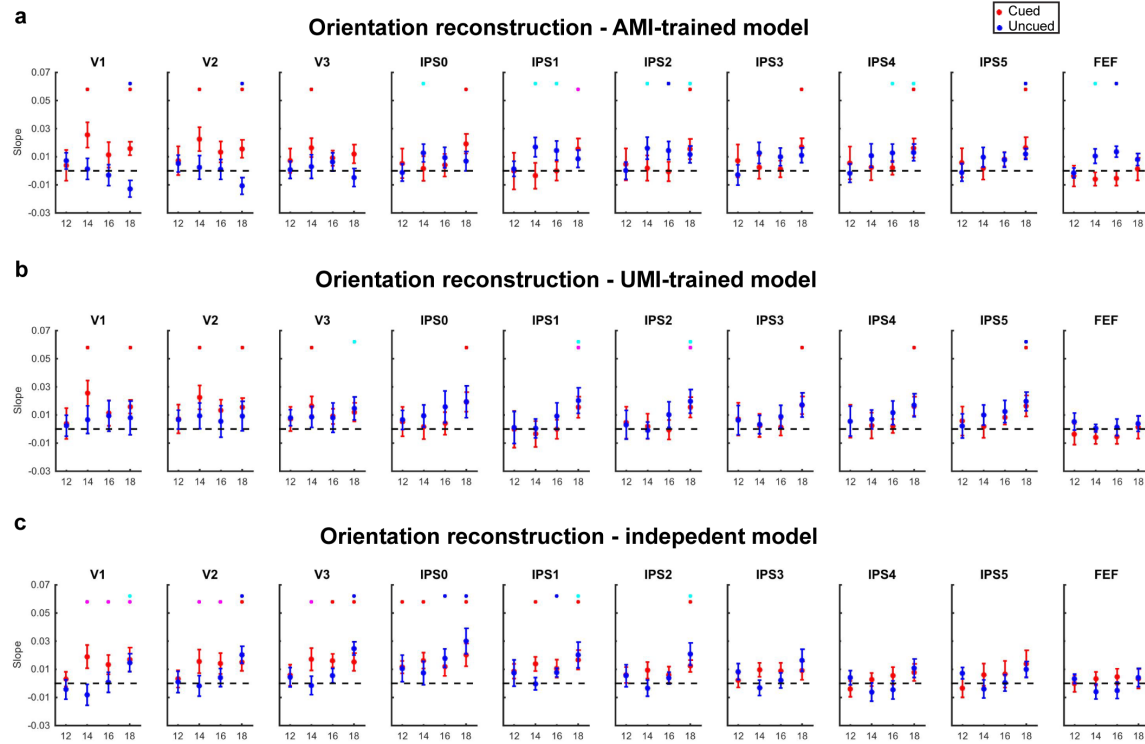

284

285 **Figure 4.** Strength of orientation reconstructions in Delay1.2 in Experiment 2.

286 Slope changes as a function of time during Delay1.2 (12, 14, 16, 18 s after trial onset) for

287 cued (AMI) and uncued (UMI) orientations. Red dots represent the AMI and blue dots

288 represent the UMI. Asterisks at the top of each figure denote the significance of each

289 reconstruction: red asterisk (AMI  $p < 0.05$ ), blue asterisk (UMI  $p < 0.05$ ), magenta

290 asterisk (AMI  $p < 0.10$ ), cyan asterisk (UMI  $p < 0.10$ ). Error bars indicate  $\pm 1$  SEM. **a.**

291 Slopes of orientation reconstructions from the AMI-trained IEM. **b.** Slopes of orientation

292 reconstructions from the UMI-trained IEM (red dots are from the AMI-trained IEM for

293 comparison purposes). **c.** Slopes of orientation reconstructions from the independent

294 IEM.

295

296 *Independent IEMs*

297           Next, we sought to reconstruct the orientations of the AMI and UMI using models  
298 trained with data from the independent 1-item delayed-recall task. For reconstructions of  
299 stimulus orientation we used an IEM trained with data from the TR beginning 4 s after  
300 sample onset. In the early visual cortex ROIs (V1-V3) reconstructions of the AMI started  
301 to emerge after 14 s and sustained across Delay1.2 ( $p = 0.087$  in V1 and  $ps < 0.036$  in V2  
302 and V3 at 18 s). For the UMI in the same ROIs, in contrast, reconstructions of the UMI  
303 were not significant across the initial 6 s of Delay1.2, before becoming positive for the  
304 final TR before probe onset ( $p = 0.087$  in V1 and  $ps < 0.00001$  in V2 and V3). In the  
305 caudal IPS (IPS0-2), in contrast to early visual regions, reconstructions of the AMI and of  
306 the UMI with the independent IEM both followed a similar pattern of steadily  
307 strengthening across the delay period (all  $ps < 0.018$  except for UMI in IPS2 ( $p = 0.060$ )  
308 and in IPS3 ( $p = 0.050$ ) at 18 s). No reconstructions were successful in rostral IPS ROIs,  
309 nor in FEF (Figure 4c).

310

### 311 *Reconstructing representations of the location of the AMI and UMI*

#### 312 *AMI- and UMI-trained IEMs*

313           In early visual cortex, whereas the location of the AMI could be reconstructed  
314 across the entirety of Delay1.2 with an AMI-trained IEM (all  $ps < 0.026$ , except for one  
315 time point (14 s) in V1 ( $p = 0.213$ ) and in V2 ( $p = 0.207$ )), the location of UMI could  
316 only be reconstructed during one early TR (14 s), all  $ps < 0.048$  (Figure 3b). In IPS and  
317 FEF, in contrast, although there was some variability across ROIs, the general pattern  
318 was of positive and sustained reconstruction of the location of the AMI (all  $ps < 0.017$  at  
319 18 s except  $p = 0.074$  in IPS1), and of negative -- and also sustained -- reconstruction of



320 the location of the UMI (all  $ps < 0.034$  at 18 s except  $ps = 0.067$  and  $0.095$  in IPS2 and  
 321 IPS4, Figure 3b; Figure 5a). This pattern resembled that of orientation reconstruction in  
 322 early visual cortex.

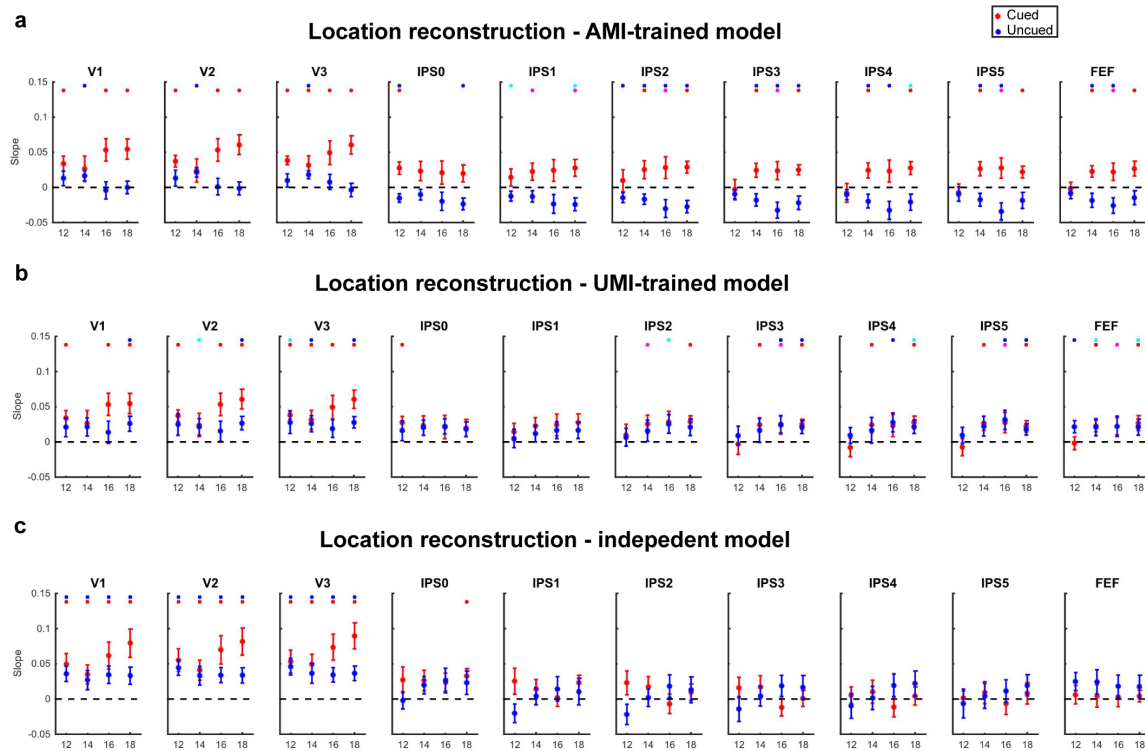

323

324 **Figure 5.** Strength of location reconstructions in Delay1.2 in Experiment 2.

325 Slope changes as a function of time during Delay1.2 (12, 14, 16, 18 s after trial onset) for

326 cued (AMI) and uncued (UMI) locations. Red dots represent the AMI and blue dots

327 represent the UMI. Asterisks at the top of each figure denote the significance of each

328 reconstruction: red asterisk (AMI  $p < 0.05$ ), blue asterisk (UMI  $p < 0.05$ ), magenta

329 asterisk (AMI  $p < 0.10$ ), cyan asterisk (UMI  $p < 0.10$ ). Error bars indicate  $\pm 1$  SEM. **a.**

330 Slopes of location reconstructions from the AMI-trained IEM. **b.** Slopes of location

331 reconstructions from the UMI-trained IEM (red dots are from the AMI-trained IEM for

332 comparison purposes). **c.** Slopes of location reconstructions from the independent IEM.

333

334 Turning to UMI-trained IEMs, in stark contrast to what was observed for  
335 reconstruction of orientation, the location of the UMI could be reconstructed in regions of  
336 both early visual cortex and rostral IPS, especially at the late TR (18 s, all  $ps < 0.048$   
337 except IPS4:  $p = 0.053$ ). Results in FEF with both AMI- and UMI-trained IEMs mirrored  
338 those from rostral IPS (Figure 5b).

### 339 *Independent IEMs*

340 For reconstructions with an IEM from the independent 1-item task we used a  
341 “delay” IEM trained with data from the TR beginning 10 s after sample onset (i.e., the  
342 end of delay period). In early visual ROIs, the location of both AMI and UMI could be  
343 successfully reconstructed, across all TRs of Delay1.2, with this independent IEM (all  $ps$   
344  $< 0.044$ ). In IPS and in FEF, in contrast, stimulus location could not be reconstructed in  
345 any ROI (except for the AMI at 18 s in IPS0,  $p = 0.010$ ; Figure 5c).

346 Although these analyses were intended to measure the working-memory  
347 representation of location context, an alternative account was possible: The successful  
348 reconstruction, in early visual cortex, of stimulus location during Delay1.2 may have  
349 merely reflected lingering activation patterns from the allocation of external attention to  
350 the trial-initiating presentation of sample stimuli. To confirm the interpretability of these  
351 results in terms of the working-memory representation of location context, we extended  
352 these analyses to Delay2, by which time no stimulus had occupied the retinotopic  
353 location of the UMI for 24 s, and Cue2 had updated the status of item to either DMI (on  
354 Stay trials) or AMI (on Switch) trials. In early visual ROIs, using the independent IEM,  
355 the strength of the representation of the location of the previously unattended item  
356 remained significantly positive for the Delay2 (all  $ps < 0.033$  except at 32 s in V1,  $p =$

357 0.154) on Switch trials. On Stay trials, in contrast, these reconstructions declined and  
358 became null in V1 and V2 (all  $p$ s > 0.352), and negative at 32 s for V3 ( $p = 0.011$ ;  
359 Supplementary Figure 5), suggesting the differentiation between location representations  
360 in early visual cortex on Stay and Switch trials.

361

## 362 **Discussion**

363 It is commonly accepted that neural representations of information, including of  
364 information held in working memory, are supported by anatomically distributed  
365 networks. What remains unclear is the extent to which stimulus-related patterns of  
366 activity that can be localized to different brain regions may employ the same or different  
367 representational formats, and may support similar or different functions. In the current  
368 study we manipulated the momentary state of priority of information in working memory,  
369 and employed multivariate encoding models to track interregional differences and  
370 dynamic transformations in the representation of behaviorally relevant information.

### 371 *Dynamic, multiplexed representation of stimulus identity in visual working memory*

372 With regard to the representation of stimulus identity (here, orientation), our  
373 results indicate that early visual cortex supports multi-dimensional representation of  
374 stimulus identity: the representation of the AMI is maintained relatively stably across the  
375 delay period, and the representation of the UMI follows a more dynamic trajectory, and  
376 only emerges when memory probe onset is imminent; the two representations share some  
377 features in common as both of them can be reconstructed using an independent IEM, but  
378 they also differ from each other, manifesting as the negative reconstruction of the UMI  
379 relative to the AMI. Although subregions in IPS and FEF also maintain some

380 representations of the AMI and UMI, the critical difference is a positive-AMI-encoded  
381 representation of the UMI, rather than a negative one, is observed in IPS and FEF.

382         The fact that information with different attentional priority is represented in  
383 different neural codes in early visual cortex but not in parietal and frontal regions  
384 supports the view that the former is the primary site for the focus of attention in visual  
385 working memory, an observation consistent with sensorimotor-recruitment models of  
386 visual working memory<sup>4,28</sup>. AMI-encoded representations of the UMI, as well as UMI-  
387 encoded representations of the UMI, were identified in several IPS ROIs and in FEF, a  
388 pattern consistent with a recent study using multivariate decoding techniques<sup>16</sup>.

389 Additionally, a novel finding from Experiments 1 and 2 was evidence for a reverse-AMI-  
390 encoded representation of the UMI in early visual cortex that emerged late in the delay  
391 period. Representations in an anatomically distinct network<sup>16,23,29</sup>, or in early visual  
392 cortex but with one or more codes that are different from a sensory code, could both be  
393 effective and mutually compatible schemes for protecting information from interference.

394         With regard to the time course of stimulus representation across the delay period,  
395 the emergence, at the end of Delay1.2, of an AMI-encoded representation of the AMI in  
396 the IPS is consistent with the idea that prioritization in working memory initiates a  
397 reconfiguration of the representational state of that information in preparation for  
398 memory-guided action<sup>7</sup>.

### 399 *Robust and distributed representation of location context*

400         Although our DSR task explicitly tested visual working memory for a nonspatial  
401 stimulus feature, the task can nevertheless not be performed successfully without the  
402 trial-specific representation of the location at which each stimulus was presented. Indeed,

403 context binding may be essential of working memory<sup>25,26</sup>. Furthermore, many studies  
404 have demonstrated the automatic binding of location information to the to-be-  
405 remembered visual features<sup>30-33</sup>.

406       Because delay-period BOLD signal intensity in IPS is markedly higher on trials  
407 that require visual working memory for 3 items drawn from the same category than for 3  
408 items drawn from different categories<sup>27</sup>, it may be that IPS recruitment scales with  
409 demands on context binding. This would be consistent with the idea that a frontoparietal  
410 salience map tracks the location context of items held in visual working memory. In  
411 Experiment 2, although the location representations of the AMI and of the UMI were  
412 robust across the delay period, the patterns were differently sensitive to attentional  
413 priority in different brain regions. Whereas early visual regions supported AMI-encoded  
414 representations of the location of the AMI but not of the UMI, the pattern in IPS and FEF  
415 was different. In addition to supporting AMI-encoded representations of the location of  
416 the AMI, IPS and FEF also, and simultaneously, supported reverse-AMI-encoded  
417 representations of the location of the UMI. Thus, unlike early visual cortex, this  
418 frontoparietal system represented the location of all items in working memory, and the  
419 priority status associated with those locations. Qualitatively, this pattern of results is  
420 reversed from what was observed for the representation of orientation. This is consistent  
421 with the idea that context and priority in visual working memory are represented by the  
422 same frontoparietal salience map that tracks these factors during behaviors that do not  
423 make any overt demands on working memory<sup>34-36</sup>.

424 *Negative reconstructions of the representation of orientation and of location context*

425           Although our results make clear that many brain areas can simultaneously  
426 represent the same information, often in similar representational formats, it seems  
427 unlikely that any two region's functions are completely redundant. Rather, we interpret  
428 our results as reflecting multiple graded distributions of functional activity, with the  
429 likelihood that, for some circuits in some instances, the primary function being supported  
430 is one other than storage, per se. The late-in-the-delay emergence of AMI-encoded  
431 representations of the AMI in IPS may be one example. Nonetheless, the delay-spanning  
432 representation of stimulus information (a.k.a., "storage") is a cardinal property of  
433 working memory, and we propose that the recoding of stimulus information into a  
434 reverse-AMI-encoded representation may be a mechanism for accomplishing this  
435 function for stimuli that are in working memory but outside the focus of attention.

436           It has been noted that the requirement of temporarily storing information in a  
437 noisy neuronal network, for later retrieval, is mathematically equivalent to transmitting  
438 that information through a noisy channel<sup>37</sup>. Shannon<sup>38</sup> demonstrated that high-fidelity  
439 transmission of information through a noisy channel can be accomplished by recoding the  
440 message into a format that takes into account the structure of the noise, then decoding it  
441 at the receiving end. One possibility is that the "negative reconstructions" that we have  
442 observed, in early visual cortex for the representation of the identity of the UMI, and in  
443 IPS and FEF for the representation of the location context of the UMI, reflect a common  
444 strategy for maintaining a high-fidelity representation of information while it is held in  
445 working memory, but outside the FoA. We note that these instances of negative  
446 reconstruction can't be characterized as inhibition, because the effect of inhibition should  
447 be to "flatten" a representation. Nor are they likely to be the inhibitory engrams

448 postulated by Barron and colleagues<sup>39</sup>, because whereas the effect of the inhibitory  
449 engram would be to minimize representation-related activity, the negative reconstructions  
450 that we have described here must be the result of an active reconfiguration of activity in  
451 all the voxels feeding into that IEM. Thus, although these reverse-AMI-encoded  
452 representations are, indeed, quantitatively negative reconstructions, in functional terms it  
453 may be more fitting to characterize them as negative to the code on which the IEM was  
454 trained.

455

## 456 **Methods**

### 457 *Participants*

458 Ten individuals (5 males, mean age  $22.8 \pm 3.8$  years) participated in Experiment 1.  
459 Two were excluded from analysis due to lack of orientation reconstruction in the first  
460 memory delay (see Results for details). Another ten individuals (4 males, mean age  $23.8$   
461  $\pm 3.5$  years) participated in Experiment 2. All were recruited from the University of  
462 Wisconsin-Madison community. All had normal or corrected-to-normal vision, were  
463 neurologically healthy, and provided written informed consent approved by the  
464 University of Wisconsin-Madison Health Sciences Institutional Review Board. All  
465 participants were monetarily compensated for their participation.

466

### 467 *Stimuli and Procedure*

468 All stimuli were created and presented using Matlab and Psychtoolbox 3  
469 extensions.

470           *Experiment 1.* Participants performed two dual serial retrocuing (DSR) tasks  
471 (*Retain1* and *Retain2*) in the scanner. During the *Retain1* trials, participants viewed two  
472 sinusoidal gratings (radius = 5°, contrast = 0.6, spatial frequency = 0.5 cycles/°, phase  
473 angle randomized between 0° and 180°) with different orientations presented  
474 simultaneously on the screen (one in each hemifield, eccentricity = 7°) for 1 s. After an  
475 interval of 0.5 s, two masks composed of random black and white lines were presented at  
476 the stimulus location for 0.25 s, followed by the first delay period. After 8 s (“Delay1.1”)   
477 a retrocue indicating which grating would be tested at the end of the trial appeared for  
478 0.75 s (Cue1). After an additional 8 s (“Delay1.2”), a probe grating requiring a Y/N  
479 recognition response was presented for 0.5 s, followed by a response period of 1.5 s  
480 (Probe1). Another two masks that were identical to the first two masks were presented  
481 after Probe1 for 0.5 s. 0.5 s later, a second cue that was always identical to the first cue  
482 appeared for 0.75 s (Cue2), indicating that participants would be tested on the same  
483 grating, followed by a delay of 8 s (Delay2). A second probe grating was presented 0.5 s,  
484 and 1.5 s was given to make the second response (Probe2). The task for both probes was  
485 to judge whether the orientation of the probe grating was the same as the cued grating,  
486 and probes were always presented at the same location as the cued grating. Half of the  
487 probes had exactly the same orientation as the cued grating, whereas the other half had an  
488 orientation difference between 10° to 20°. Intertrial-interval was either 4 s or 6 s. *Retain2*  
489 trials had exactly the same procedure as *Retain1* trials, except that Cue1 did not predict  
490 Cue2. Therefore, on half of the trials, Cue2 was identical to Cue1, meaning that the same  
491 cued orientation would be probed twice (a “*Retain2-stay*” trial); and on the other half  
492 Cue2 was different from Cue1, meaning that Probe2 would probe memory for the target



493 that had not been tested by Probe1 (a “*Retain2-switch*” trial, Figure 1a). Following our  
494 previous work, the item cued by Cue1 was termed the AMI and the item that was not  
495 cued by Cue1 in *Retain2* condition was termed the UMI. In addition, the item that was  
496 not cued by Cue1 in *Retain1* condition was termed the “dropped memory item” (DMI),  
497 because it could be dropped from working memory. The two tasks were conducted in  
498 separate blocks, and participants were informed which task they would be performing at  
499 the beginning of each block. The two orientations on each trial were randomly selected  
500 from a fixed set of eight orientations ( $0^\circ$ ,  $22.5^\circ$ ,  $45^\circ$ ,  $67.5^\circ$ ,  $90^\circ$ ,  $112.5^\circ$ ,  $135^\circ$ ,  $157.5^\circ$  with  
501 a random jitter between  $0^\circ$  and  $3^\circ$ ). With the constraint that each of the eight orientations  
502 appeared once in both locations during each run, and that the two orientations on any  
503 given trial could never be the same. This resulted in a minimum distance of  $22.5^\circ$   
504 between the two orientations on every trial. Each run began with an 8-s blank period, was  
505 comprised of 16 trials, and lasted 600 s. Six of the participants performed six runs of the  
506 *Retain1* task, one performed seven runs and one performed twelve runs. Seven  
507 participants performed twelve runs of the *Retain2* task, and one performed fourteen runs.

508 *Experiment 2.* Participants performed two working memory tasks in the scanner.  
509 The first task was one-item delayed recall (a.k.a. “delayed estimation”) of orientation,  
510 intended for training IEMs that would be used to analyze data from this experiment’s  
511 DSR task. On each trial, one grating (radius =  $2^\circ$ , contrast = 0.6, spatial frequency = 0.5  
512 cycles/ $^\circ$ , phase angle randomized between  $0^\circ$  and  $180^\circ$ ) was presented on the screen with  
513 an eccentricity of  $7^\circ$  and participants were asked to remember its orientation. The  
514 location of the grating was chosen from six fixed locations ( $60^\circ$  of distance from each  
515 other), and the orientation of the grating was chosen from nine orientations ( $0^\circ$ ,  $20^\circ$ ,  $40^\circ$ ,

516 60°, 80°, 100°, 120°, 140°, 160°) with a random jitter between 0° and 3°. The grating  
517 appeared on the screen for 1 s, followed by a delay period of 9 s, and then by a response  
518 period of 4 s. During the response period, an orientation wheel (2° in radius) was  
519 presented at the same location as the sample grating, and participants needed to rotate the  
520 needle at the center of the wheel to make it match the remembered orientation as  
521 precisely as possible. The inter-trial-interval was fixed at 8 s. Each run consisted of  
522 eighteen trials, resulting in a run length of 404 s. Participants performed a total of 24 to  
523 30 runs of the one-item working memory task in two separate scan sessions.

524         The second task was a two-item DSR task testing delayed recall (a.k.a. “delayed  
525 estimation”) of orientation patches that could appear in any of six possible locations. On  
526 each trial, participants viewed two gratings (parameters identical to those in the first task)  
527 presented at two of six fixed locations and were asked to remember both. The two  
528 gratings appeared on the screen for 2 s, followed by a first delay period (Delay1.1) of 8 s.  
529 After that a cue appeared at the center of the screen for 0.75 s, which was a triangle-  
530 shaped arrow that pointed to one of the two sample locations. After another 8 s  
531 (Delay1.2), an orientation wheel was presented at the same location as the cued grating,  
532 and participants needed to reproduce the cued orientation on the wheel within a 4-s  
533 response window. 0.5 s after the first response period, participants saw a second cue, 50%  
534 of which would point to the first cued location (Stay), and the other 50% would point to  
535 the first uncued location (Switch). After a third 8 s of delay (Delay2), a second  
536 orientation wheel was presented at the same location as the second-cued grating, and  
537 again participants needed to reproduce the cued orientation on the wheel in 4 s (Figure  
538 1b). The inter-trial-interval was fixed at 8 s. Each run consisted of twelve trials, resulting

539 in a run length of 536 s. Participants performed 12 runs of this DSR task in one scan  
540 session.

541 In both experiments, electrooculography (EOG) of vertical and horizontal eye  
542 movements was recorded while participants performed the tasks in the scanner to ensure  
543 central fixation throughout each trial.

544

#### 545 *Behavioral analysis for Experiment 2*

546 We analyzed behavioral responses with a three-factor mixture model<sup>40</sup> that uses  
547 maximum likelihood estimation to generate estimates of 1) the proportion of responses  
548 based on a representation of the probed item (“responses to target”); 2) the proportion of  
549 responses incorrectly based on a representation of the unprobed item (i.e., “misbinding”  
550 or “swap” errors); and 3) the proportion of responses that were guesses not based on  
551 either memory item; as well as 4) a “concentration” parameter that estimates the  
552 precision of target responses. Conceptually, the concentration parameter is similar to a  
553 model-free measure of the precision of responses that is computed as the inverse of the  
554 standard deviation of the distribution of responses.

555

#### 556 *Data acquisition*

557 Whole-brain images were acquired using a 3 Tesla GE MR scanner (Discovery  
558 MR750; GE Healthcare) at the Lane Neuroimaging Laboratory at the University of  
559 Wisconsin–Madison HealthEmotions Research Institute (Department of Psychiatry).  
560 Functional imaging was conducted using a gradient-echo echo-planar sequence (2 s  
561 repetition time (TR), 22 ms echo time (TE), 60° flip angle) within a 64 × 64 matrix (42

562 axial slices, 3 mm isotropic). A high-resolution T1 image was also acquired for each  
563 session with a fast spoiled gradient-recalled-echo sequence (8.2 ms TR, 3.2 ms TE, 12°  
564 flip angle, 176 axial slices, 256 × 256 in- plane, 1.0 mm isotropic).

565

#### 566 *Data preprocessing*

567 Functional MRI data were preprocessed using AFNI (<http://afni.nimh.nih.gov>)<sup>41</sup>.

568 The data were first registered to the final volume of each scan, and then to anatomical  
569 images of the first scan session. The data were then motion corrected, detrended, and z-  
570 score normalized within each run.

571

#### 572 *ROI definition*

573 Anatomical ROIs were created by extracting masks from the probabilistic atlas of  
574 Wang and colleagues<sup>42</sup>, and warping them to each subject's structural scan in native  
575 space.

576 Analyses in Experiment 1 were carried out in a Sample-defined ROI within a  
577 merged V1-V3 ROI. In Experiment 1, we modeled each trial with six boxcar regressors:  
578 Sample (1 s), Delay1.1 (8 s), Delay1.2 (8 s), Probe1 (2 s), Delay2 (8 s), and Probe2 (2 s).  
579 We focused on voxels with the highest sample-evoked response because these tend to  
580 show high decoding accuracy of delay-period signal<sup>14,16,43</sup>. Specifically, we selected the  
581 top 1000 voxels that responded maximally during the sample period, within the visual  
582 cortex (V1-V3 combined). All the analyses were performed in the contralateral  
583 retinotopic ROIs.

584 Analyses in Experiment 2 were carried out in individual atlas-defined ROIs,  
585 including early visual cortex (V1-V3), IPS (IPS0-IPS5), and FEF. All the analyses were  
586 performed in each ROI merged between the right and left hemispheres.

587

### 588 *Multivariate inverted encoding modeling*

589 We used inverted encoding models (IEMs) to evaluate the representation of  
590 orientation (in Experiments 1 and 2) and of location (in Experiment 2) of the AMI and  
591 UMI during different trial epochs. The IEM assumes that the responses of each voxel can  
592 be characterized by a small number of hypothesized tuning channels. In Experiment 1 the  
593 number of orientation tuning channels was eight, and in Experiment 2 the number of  
594 orientation tuning channels was nine and the number of location tuning channels was six.  
595 Following previous work<sup>22,44</sup>, the idealized feature tuning curve of each channel was  
596 defined as a half-wave-rectified and squared sinusoid raised to the sixth power (FWHM =  
597 0.94 rad) for orientation in Experiment 1, to the eighth power (FWHM = 0.82 rad) for  
598 orientation in Experiment 2, and to the sixth power (FWHM = 1.88 in rad) for location in  
599 Experiment 2.

600 Before feeding the preprocessed data into the IEM, a baseline from each voxel's  
601 response was removed in each run using the following equation from<sup>19</sup>:

$$602 \quad B = B - m(m^T B)$$

603 in which  $B$  represented the data matrix from each run with size  $v \times c$  ( $v$ : the number of  
604 voxels in the ROI;  $c$ : the number of orientations/locations) and  $m$  represented the mean  
605 response across all stimulus conditions of length  $v$ . A constant of 100 was added to  $B$  to  
606 avoid matrix inversion problems after baseline removal.

607 We then computed the weight matrix ( $W$ ) that projects the hypothesized channel  
608 responses ( $C_1$ ) to actual measured fMRI signals in the training dataset ( $B_1$ ), and extracted  
609 the estimated channel responses ( $\hat{C}_2$ ) for the test dataset ( $B_2$ ) using this weight matrix.

610 The relationship between the training dataset ( $B_1$ ,  $v \times n$ ,  $n$ : the number of repeated  
611 measurements) and the channel responses ( $C_1$ ,  $k \times n$ ) was characterized by:

$$B_1 = WC_1$$

612 Where  $W$  was the weight matrix ( $v \times k$ ).

613 Therefore, the least-squared estimate of the weight matrix ( $\hat{W}$ ) was calculated  
614 using linear regression:

$$615 \hat{W} = B_1 C_1^T (C_1 C_1^T)^{-1}$$

616 The channel responses ( $\hat{C}_2$ ) for the test dataset ( $B_2$ ) was then estimated using the  
617 weight matrix ( $\hat{W}$ ):

$$618 \hat{C}_2 = (\hat{W}^T \hat{W})^{-1} \hat{W}^T B_2$$

619 For Experiment 1, we used a leave-one-run-out procedure to build the weight  
620 matrix and to calculate the estimated channel outputs for each of eight orientations in the  
621 test dataset. IEMs were constructed with average signals across several time points  
622 during an epoch of interest. The obtained weight matrices were applied to the same time  
623 points in the test dataset. The estimated channel outputs obtained after each iteration were  
624 shifted to a common center, with  $0^\circ$  corresponding to the cued orientation channel. The  
625 shifted channel outputs were then averaged across all iterations and all time points of  
626 interest within each participant. For Experiment 2, multiple IEMs were trained. First, as  
627 with Experiment 1, we used a leave-one-run-out procedure to train IEMs on the AMI  
628 from Delay1.2 and on the UMI from Delay1.2, on signals at each time point of interest.

629 Additionally, we trained “independent” IEMs with data from the one-item delayed-recall  
630 task, and tested these IEMs on data from the DSR task. We used the TR 4 s after trial  
631 onset to train an orientation IEM, and the TR 10 s after trial onset to train a location IEM.  
632 All the IEMs were estimated for orientations and locations separately.

633 To characterize the strength of each reconstruction, we collapsed over the channel  
634 responses on both sides of the cued channel, averaged them, and calculated the slope of  
635 each collapsed reconstruction using linear regression. A larger positive slope indicates  
636 stronger positive representation, and a larger negative slope indicates stronger negative  
637 representation. We used a bootstrapping procedure to characterize the significance of the  
638 slopes. For each condition, eight (in Experiment 1) or ten (in Experiment 2)  
639 orientation/location reconstructions were randomly sampled with replacement from the  
640 reconstruction pool of eight (in Experiment 1) or ten (in Experiment 2) participants and  
641 averaged. This procedure was repeated 10000 times, resulting in 10000 average  
642 orientation/location reconstructions for each condition, and correspondingly 10000  
643 slopes. To obtain a two-tailed measure of the  $p$  values, the probabilities of obtaining a  
644 positive ( $p_{\text{pos}}$ ) or negative ( $p_{\text{neg}}$ ) slope among the 10000 slopes was calculated separately,  
645 and the  $p$  value of the bootstrapping test was calculated using the following equation:

$$646 \quad p = 2 * \min(p_{\text{pos}}, p_{\text{neg}})$$

647

## 648 **Acknowledgements**

649 This work was supported by National Institutes of Health grant R01MH064498 to B.R.P.

650

## 651 **Author Contributions**

652 Q.Y. and B.R.P. designed the experiment. Q.Y. conducted the experiment and analyzed  
653 the data. Q.Y. and B.R.P. wrote the manuscript.

654

### 655 **Competing Interests statement**

656 The authors declare no competing interests.

657

### 658 **References**

- 659 1 Miller, E. K. & Cohen, J. D. An integrative theory of prefrontal cortex function.  
660 *Annu Rev Neurosci* **24**, 167-202, doi:10.1146/annurev.neuro.24.1.167 (2001).
- 661 2 Stokes, M. G. *et al.* Dynamic coding for cognitive control in prefrontal cortex.  
662 *Neuron* **78**, 364-375, doi:10.1016/j.neuron.2013.01.039 (2013).
- 663 3 Baddeley, A. Working memory: looking back and looking forward. *Nat Rev*  
664 *Neurosci* **4**, 829-839, doi:10.1038/nrn1201 (2003).
- 665 4 D'Esposito, M. & Postle, B. R. The cognitive neuroscience of working memory.  
666 *Annu Rev Psychol* **66**, 115-142, doi:10.1146/annurev-psych-010814-015031  
667 (2015).
- 668 5 Cowan, N. *Attention and memory : an integrated framework.* (Oxford University  
669 Press, 1995).
- 670 6 Oberauer, K. Access to information in working memory: exploring the focus of  
671 attention. *J Exp Psychol Learn Mem Cogn* **28**, 411-421 (2002).
- 672 7 Myers, N. E., Stokes, M. G. & Nobre, A. C. Prioritizing Information during  
673 Working Memory: Beyond Sustained Internal Attention. *Trends Cogn Sci* **21**,  
674 449-461, doi:10.1016/j.tics.2017.03.010 (2017).
- 675 8 Sprague, T. C., Ester, E. F. & Serences, J. T. Restoring Latent Visual Working  
676 Memory Representations in Human Cortex. *Neuron* **91**, 694-707,  
677 doi:10.1016/j.neuron.2016.07.006 (2016).
- 678 9 Owen, A. M., McMillan, K. M., Laird, A. R. & Bullmore, E. N-back working  
679 memory paradigm: a meta-analysis of normative functional neuroimaging studies.  
680 *Hum Brain Mapp* **25**, 46-59, doi:10.1002/hbm.20131 (2005).
- 681 10 Conway, A. R. *et al.* Working memory span tasks: A methodological review and  
682 user's guide. *Psychon Bull Rev* **12**, 769-786 (2005).
- 683 11 Larocque, J. J., Lewis-Peacock, J. A. & Postle, B. R. Multiple neural states of  
684 representation in short-term memory? It's a matter of attention. *Front Hum*  
685 *Neurosci* **8**, 5, doi:10.3389/fnhum.2014.00005 (2014).
- 686 12 Lewis-Peacock, J. A., Drysdale, A. T., Oberauer, K. & Postle, B. R. Neural  
687 Evidence for a Distinction between Short-term Memory and the Focus of  
688 Attention. *Journal of Cognitive Neuroscience* **24**, 61-79 (2012).



- 689 13 LaRocque, J. J., Lewis-Peacock, J. A., Drysdale, A. T., Oberauer, K. & Postle, B.  
690 R. Decoding attended information in short-term memory: an EEG study. *J Cogn*  
691 *Neurosci* **25**, 127-142, doi:10.1162/jocn\_a\_00305 (2013).
- 692 14 LaRocque, J. J., Riggall, A. C., Emrich, S. M. & Postle, B. R. Within-Category  
693 Decoding of Information in Different Attentional States in Short-Term Memory.  
694 *Cereb Cortex* **27**, 4881-4890, doi:10.1093/cercor/bhw283 (2017).
- 695 15 Rose, N. S. *et al.* Reactivation of latent working memories with transcranial  
696 magnetic stimulation. *Science* **354**, 1136-1139, doi:10.1126/science.aah7011  
697 (2016).
- 698 16 Christophel, T. B., Iamshchinina, P., Yan, C., Allefeld, C. & Haynes, J. D.  
699 Cortical specialization for attended versus unattended working memory. *Nat*  
700 *Neurosci*, doi:10.1038/s41593-018-0094-4 (2018).
- 701 17 Barak, O. & Tsodyks, M. Working models of working memory. *Curr Opin*  
702 *Neurobiol* **25**, 20-24, doi:10.1016/j.conb.2013.10.008 (2014).
- 703 18 Wolff, M. J., Jochim, J., Akyurek, E. G. & Stokes, M. G. Dynamic hidden states  
704 underlying working-memory-guided behavior. *Nat Neurosci* **20**, 864-871,  
705 doi:10.1038/nn.4546 (2017).
- 706 19 Brouwer, G. J. & Heeger, D. J. Cross-orientation suppression in human visual  
707 cortex. *J Neurophysiol* **106**, 2108-2119, doi:10.1152/jn.00540.2011 (2011).
- 708 20 Brouwer, G. J. & Heeger, D. J. Decoding and reconstructing color from responses  
709 in human visual cortex. *J Neurosci* **29**, 13992-14003,  
710 doi:10.1523/JNEUROSCI.3577-09.2009 (2009).
- 711 21 Sprague, T. C. *et al.* Inverted Encoding Models Assay Population-Level Stimulus  
712 Representations, Not Single-Unit Neural Tuning. *eNeuro*,  
713 doi:https://doi.org/10.1523/ENEURO.0098-18.2018 (2018).
- 714 22 Ester, E. F., Sprague, T. C. & Serences, J. T. Parietal and Frontal Cortex Encode  
715 Stimulus-Specific Mnemonic Representations during Visual Working Memory.  
716 *Neuron* **87**, 893-905, doi:10.1016/j.neuron.2015.07.013 (2015).
- 717 23 Xu, Y. Reevaluating the Sensory Account of Visual Working Memory Storage.  
718 *Trends Cogn Sci* **21**, 794-815, doi:10.1016/j.tics.2017.06.013 (2017).
- 719 24 Lorenc, E. S., Sreenivasan, K. K., Nee, D. E., Vandembroucke, A. R. E. &  
720 D'Esposito, M. Flexible coding of visual working memory representations during  
721 distraction. *J Neurosci*, doi:10.1523/JNEUROSCI.3061-17.2018 (2018).
- 722 25 Oberauer, K. & Lin, H. Y. An interference model of visual working memory.  
723 *Psychol Rev* **124**, 21-59, doi:10.1037/rev0000044 (2017).
- 724 26 Schneegans, S. & Bays, P. M. Neural Architecture for Feature Binding in Visual  
725 Working Memory. *J Neurosci* **37**, 3913-3925, doi:10.1523/JNEUROSCI.3493-  
726 16.2017 (2017).
- 727 27 Gosseries, O. *et al.* Parietal-Occipital Interactions Underlying Control- and  
728 Representation-Related Processes in Working Memory for Nonspatial Visual  
729 Features. *J Neurosci* **38**, 4357-4366, doi:10.1523/JNEUROSCI.2747-17.2018  
730 (2018).
- 731 28 Serences, J. T., Ester, E. F., Vogel, E. K. & Awh, E. Stimulus-specific delay  
732 activity in human primary visual cortex. *Psychol Sci* **20**, 207-214,  
733 doi:10.1111/j.1467-9280.2009.02276.x (2009).

- 734 29 Mendoza-Halliday, D., Torres, S. & Martinez-Trujillo, J. C. Sharp emergence of  
735 feature-selective sustained activity along the dorsal visual pathway. *Nat Neurosci*  
736 **17**, 1255-1262, doi:10.1038/nn.3785 (2014).
- 737 30 Foster, J. J., Bsales, E. M., Jaffe, R. J. & Awh, E. Alpha-Band Activity Reveals  
738 Spontaneous Representations of Spatial Position in Visual Working Memory.  
739 *Curr Biol* **27**, 3216-3223 e3216, doi:10.1016/j.cub.2017.09.031 (2017).
- 740 31 Postle, B. R., Awh, E., Serences, J. T., Sutterer, D. W. & D'Esposito, M. The  
741 positional-specificity effect reveals a passive-trace contribution to visual short-  
742 term memory. *PLoS One* **8**, e83483, doi:10.1371/journal.pone.0083483 (2013).
- 743 32 Rajsic, J. & Wilson, D. E. Asymmetrical access to color and location in visual  
744 working memory. *Atten Percept Psychophys* **76**, 1902-1913, doi:10.3758/s13414-  
745 014-0723-2 (2014).
- 746 33 Sereno, A. B. & Amador, S. C. Attention and memory-related responses of  
747 neurons in the lateral intraparietal area during spatial and shape-delayed match-to-  
748 sample tasks. *J Neurophysiol* **95**, 1078-1098, doi:10.1152/jn.00431.2005 (2006).
- 749 34 Bisley, J. W. & Goldberg, M. E. Attention, intention, and priority in the parietal  
750 lobe. *Annu Rev Neurosci* **33**, 1-21, doi:10.1146/annurev-neuro-060909-152823  
751 (2010).
- 752 35 Jerde, T. A., Merriam, E. P., Riggall, A. C., Hedges, J. H. & Curtis, C. E.  
753 Prioritized maps of space in human frontoparietal cortex. *J Neurosci* **32**, 17382-  
754 17390, doi:10.1523/JNEUROSCI.3810-12.2012 (2012).
- 755 36 Sprague, T. C. & Serences, J. T. Attention modulates spatial priority maps in the  
756 human occipital, parietal and frontal cortices. *Nat Neurosci* **16**, 1879-1887,  
757 doi:10.1038/nn.3574 (2013).
- 758 37 Koyluoglu, O. O., Pertzov, Y., Manohar, S., Husain, M. & Fiete, I. R.  
759 Fundamental bound on the persistence and capacity of short-term memory stored  
760 as graded persistent activity. *Elife* **6**, doi:10.7554/eLife.22225 (2017).
- 761 38 Shannon, C. E. A mathematical theory of communication. *The Bell System*  
762 *Technical Journal* **27**, 379-423, doi:10.1002/j.1538-7305.1948.tb01338.x (1948).
- 763 39 Barron, H. C., Vogels, T. P., Behrens, T. E. & Ramaswami, M. Inhibitory  
764 engrams in perception and memory. *Proc Natl Acad Sci U S A* **114**, 6666-6674,  
765 doi:10.1073/pnas.1701812114 (2017).
- 766 40 Bays, P. M., Catalao, R. F. & Husain, M. The precision of visual working  
767 memory is set by allocation of a shared resource. *J Vis* **9**, 7 1-11,  
768 doi:10.1167/9.10.7 (2009).
- 769 41 Cox, R. W. AFNI: software for analysis and visualization of functional magnetic  
770 resonance neuroimages. *Comput Biomed Res* **29**, 162-173 (1996).
- 771 42 Wang, L., Mruczek, R. E. B., Arcaro, M. J. & Kastner, S. Probabilistic maps of  
772 visual topography in human cortex. *Cerebral Cortex* **25**, 3911-3931 (2015).
- 773 43 Emrich, S. M., Riggall, A. C., Larocque, J. J. & Postle, B. R. Distributed patterns  
774 of activity in sensory cortex reflect the precision of multiple items maintained in  
775 visual short-term memory. *J Neurosci* **33**, 6516-6523,  
776 doi:10.1523/JNEUROSCI.5732-12.2013 (2013).
- 777 44 Yu, Q. & Shim, W. M. Occipital, parietal, and frontal cortices selectively  
778 maintain task-relevant features of multi-feature objects in visual working

779 memory. *Neuroimage* **157**, 97-107, doi:10.1016/j.neuroimage.2017.05.055  
780 (2017).  
781
